# Supplementary material for: Directional control of surface rolling molecules exploiting non-uniform heat-induced substrates
Source: Royal Society of Chemistry journal article supplement (doi:10.1039/d0cp04960c), 2020-01-01
Supplement: d0cp04960c1.pdf [file d0cp04960c1.pdf]

## Supplementary Information

# *Directional Control of Surface Rolling Molecules Exploiting Non-uniform Heat Induced Substrates*

Alireza Nemati,<sup>a</sup> Hossein Nejat Pishkenari,<sup>b</sup> Ali Meghdari,<sup>b</sup> Shuzhi Sam Ge,<sup>a,c</sup>

<sup>a</sup> Institute for Future (IFF), Qingdao University, Qingdao 266071, China

<sup>b</sup> Center of Excellence in Design, Robotic and Automation (CEDRA), Sharif University of Technology, Tehran, Iran

<sup>c</sup> Department of Electrical and Computer Engineering, National University of Singapore, 119077, Singapore

### Table of Contents

|                                                                                                     |    |
|-----------------------------------------------------------------------------------------------------|----|
| Figure S1. Top layer structure of gold atoms of the substrate at the different temperature .....    | S2 |
| Figure S2. . The displacement of nanocars along and perpendicular to the temperature gradient ..... | S2 |
| Table S1. The parameters used in calculation of Lennard-Jones potential .....                       | S3 |
| Table S2. The parameters used in the computation of the angle terms .....                           | S3 |
| Table S3. The parameters used in the computation of the bond terms .....                            | S3 |
| Table S4. The parameters used in the computation of the dihedral terms .....                        | S4 |

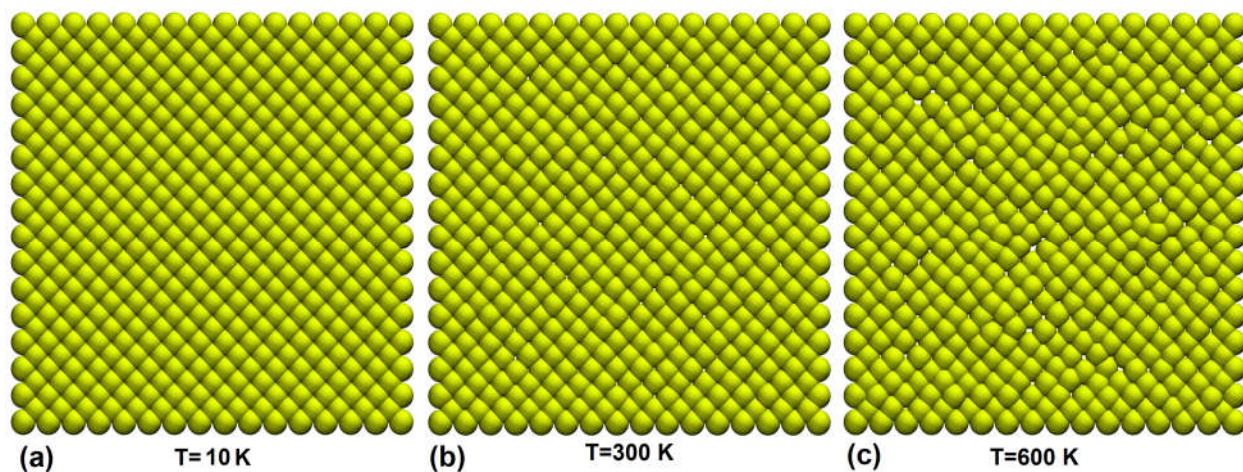

Figure S1. The structure of the top layer of gold atoms of the substrate at the temperature of a) 10 K, b) 300 K, and c) 600 K. The irregularity in the substrate structure result intensified fluctuation of the c60 binding energy during its movement on substrate.

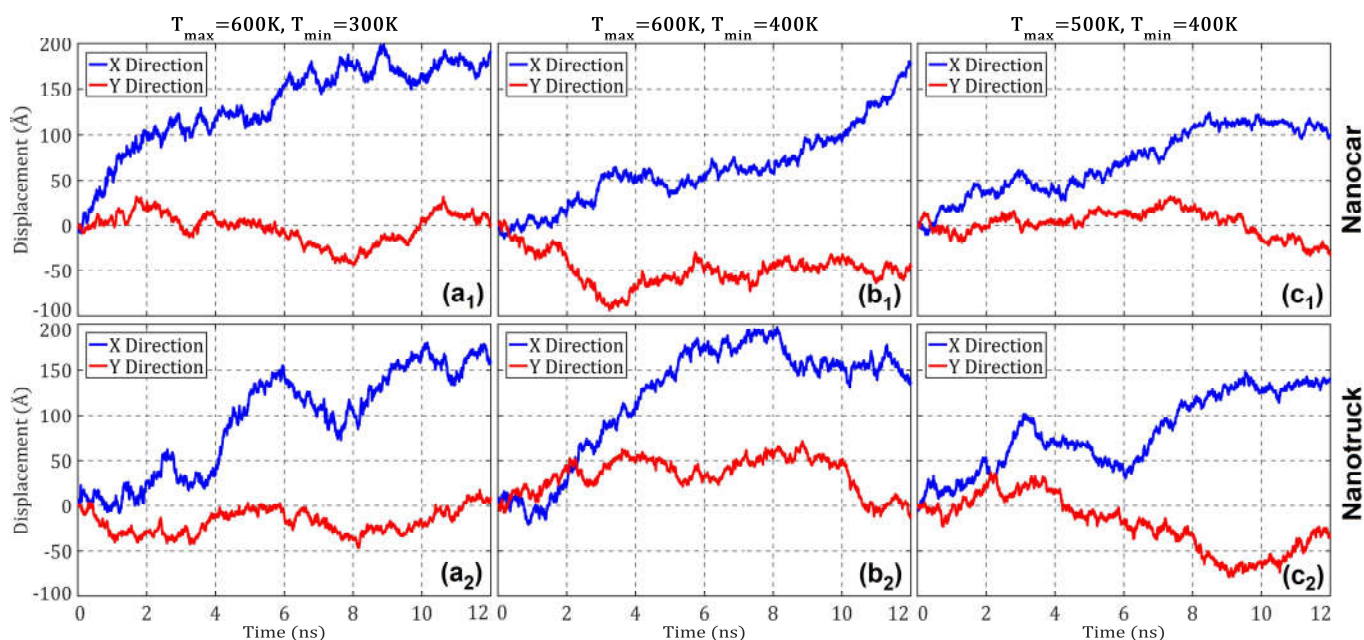

Figure S2. The displacement of nanocars along and perpendicular to the temperature gradient at different temperature distribution cases: a1) 600-300 K, b1) 600-400 K, c1) 500-400 K, a2) 600-300 K, b2) 600-400 K, and c2) 500-400 K. The results show that the motion of the studied molecular machine was affected by the temperature gradient since their motion along the X direction (along the gradient) is faster and has a longer range compared to their mobility in the Y direction (perpendicular to the gradient).

The 6-12 Lennard-Jones potential used in this study is presented in Equation 1. The  $\epsilon$  shows the potential energy at the equilibrium distance, and  $\sigma$  is the distance at which the potential energy is zero.

$$E_{LJ} = 4\epsilon \left[ \left( \frac{\sigma}{r} \right)^{12} - \left( \frac{\sigma}{r} \right)^6 \right], \quad r < r_{cut-off} \quad (1)$$

Table S1. The Lennard-Jones parameters employed in this study

| $\epsilon$ (eV) | $\sigma$ (Å) | Description | $\epsilon$ (eV) | $\sigma$ (Å) | Description |
|-----------------|--------------|-------------|-----------------|--------------|-------------|
| 0.01273         | 2.994        | C2-Au       | 0.01273         | 2.994        | CA-Au       |
| 0.01315         | 2.611        | H-Au        | 0.00190         | 3.460        | CA-CA       |
| 0.01423         | 2.886        | N-Au        | 0.00213         | 3.350        | CA-N        |
| 0.00190         | 3.460        | C2-C2       | 0.00197         | 3.647        | CA-H        |
| 0.00230         | 3.244        | N-N         | 0.00190         | 3.460        | C2-CA       |
| 0.00204         | 2.673        | H-H         | 0.00197         | 3.647        | C2-H        |
| 0.00213         | 3.350        | C2-N        | 0.00220         | 2.958        | N-H         |

The form of the angle terms used in this study is presented in Equation 2, and the employed parameters are listed in Table S2.

$$E_{angle} = K_a(\theta - \theta_0)^2 \quad (2)$$

Table S2. The angle parameters used in the simulations

| $K_a$ ( $\frac{eV}{rad^2}$ ) | $\theta_0$ | Description |
|------------------------------|------------|-------------|
| 1.46619                      | $\pi$      | C2-C2-CA    |
| 1.34141                      | $2\pi/3$   | C2-CA-CA    |
| 1.34141                      | $2\pi/3$   | CA-CA-CA    |
| 1.12304                      | $2\pi/3$   | CA-CA-H     |
| 1.34141                      | $2\pi/3$   | CA-CA-N     |
| 1.34141                      | $0.638\pi$ | CA-N-CA     |

Equation 3 shows the bond terms employed in this study, and the related parameters are listed in Table S3.

$$E_{bond} = K_b(r - r_0)^2 \quad (3)$$

Table S3. The bond parameters used in the simulations

| $K_b$ ( $\frac{eV}{\text{Å}^2}$ ) | $r_0$ (Å) | Description |
|-----------------------------------|-----------|-------------|
| 48.6652                           | 1.212     | C2-C2       |
| 30.8837                           | 1.313     | C2-CA       |
| 25.1593                           | 1.392     | CA-CA       |
| 14.35                             | 1.101     | CA-H        |
| 34.596                            | 1.260     | CA-N        |

The form of the dihedral terms employed in this study is presented in Equation 4, and its related parameters are listed in Table S4. The  $K_{d3}$  and  $K_{d4}$  parameters are zero due to the structure of the nanotruck and the nanocar.

$$E_{\text{dihedral}} = \frac{1}{2}K_{d1}(1 + \cos \varphi) + \frac{1}{2}K_{d2}(1 - \cos 2\varphi) + \frac{1}{2}K_{d3}(1 + \cos 3\varphi) + \frac{1}{2}K_{d4}(1 - \cos 4\varphi) \quad (4)$$

Table S4. The angle parameters used in the simulations

| $K_{d1}(\text{eV})$ | $K_{d2}(\text{eV})$ | Description |
|---------------------|---------------------|-------------|
| 0                   | 0.0000434           | CA-C2-C2-CA |
| 0                   | 0.0000434           | C2-C2-CA-CA |
| 0                   | 0.650451            | C2-CA-CA-CA |
| 0                   | 0.650451            | C2-CA-CA-H  |
| -0.0403             | 0.208144            | CA-CA-CA-CA |
| 0                   | 0.234379            | CA-CA-CA-H  |
| 0.0433              | 0.650451            | CA-CA-CA-N  |
| 0                   | 0.390271            | H-CA-CA-H   |
| 0                   | 0.650451            | H-CA-CA-N   |
| 0                   | 0.433634            | N-CA-CA-N   |
